# Supplementary material for: Synthesis and Stereochemical Characterization of a Novel Chiral α-Tetrazole Binaphthylazepine Organocatalyst
Source: MDPI journal article supplement (doi:10.3390/molecules27165113), 2022-08-11
Supplement: s1 [file s1]

## Supporting Information

# Synthesis and Stereochemical Characterization of a Novel Chiral $\alpha$ -Tetrazole Binaphthylazepine Organocatalyst

**Assunta Summa<sup>1</sup>, Patrizia Scafato<sup>1</sup>, Sandra Belviso<sup>1</sup>, Guglielmo Monaco<sup>2</sup>,  
Riccardo Zanasi<sup>2</sup>, Giovanna Longhi<sup>3,4</sup>, Sergio Abbate<sup>3,4</sup>,  
and Stefano Superchi<sup>1,\*</sup>**

<sup>1</sup> Department of Sciences, University of Basilicata, Via dell'Ateneo Lucano 10, 85100 Potenza, Italy;

<sup>2</sup> Department of Chemistry and Biology "A. Zambelli", University of Salerno, Via Giovanni Paolo II, 84084 Fisciano (Salerno), Italy;

<sup>3</sup> Department Molecular and Translational Medicine, University of Brescia, viale Europa 11, 25123 Brescia, Italy;

<sup>4</sup> Unit of Brescia, Consiglio Nazionale delle Ricerche-I.N.O. c/o CSMT, 25123 Brescia, Italy.

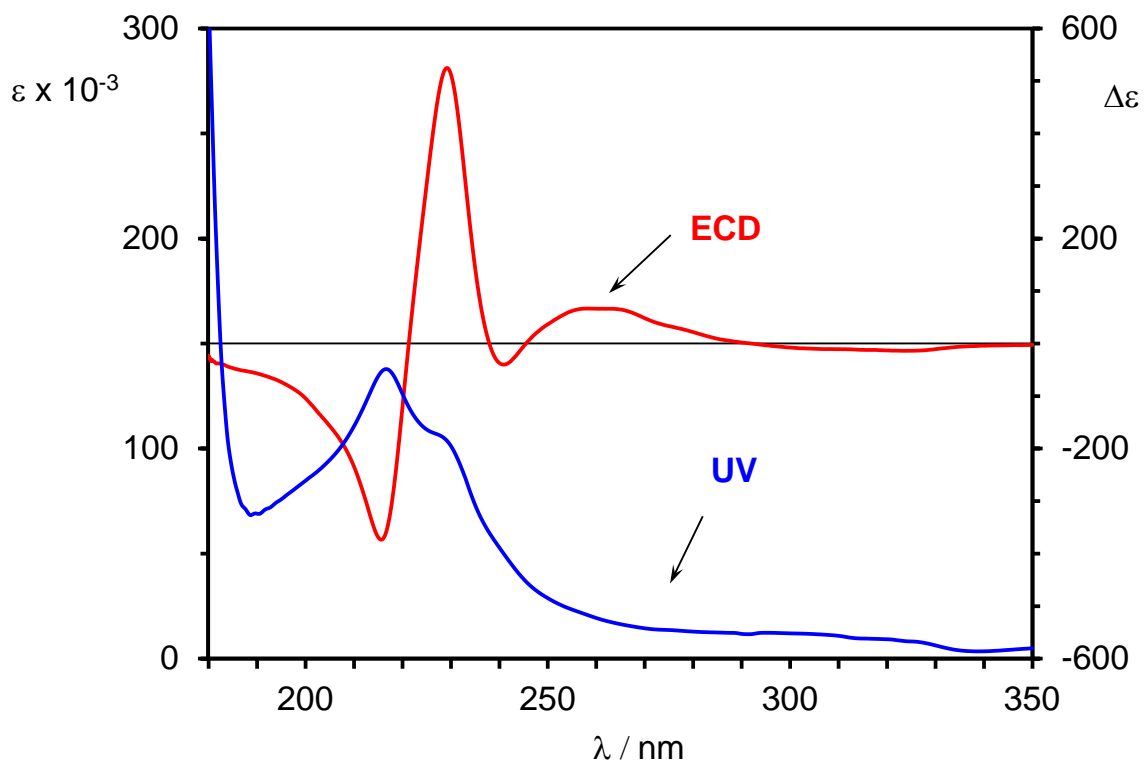

**Figure S1.** Experimental UV (blue line) and ECD (red line) spectra of (S<sub>a</sub>)-6 in acetonitrile.

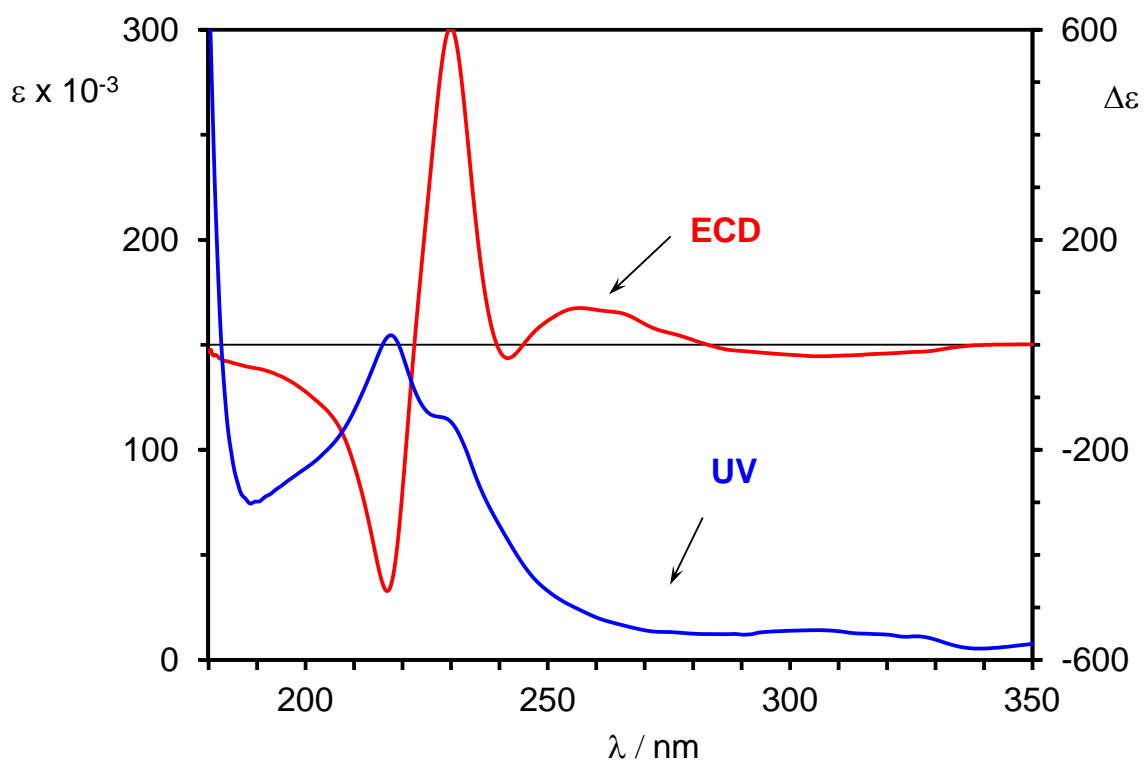

**Figure S2.** Experimental UV (blue line) and ECD (red line) spectra of (R,S<sub>a</sub>)-8 in acetonitrile.

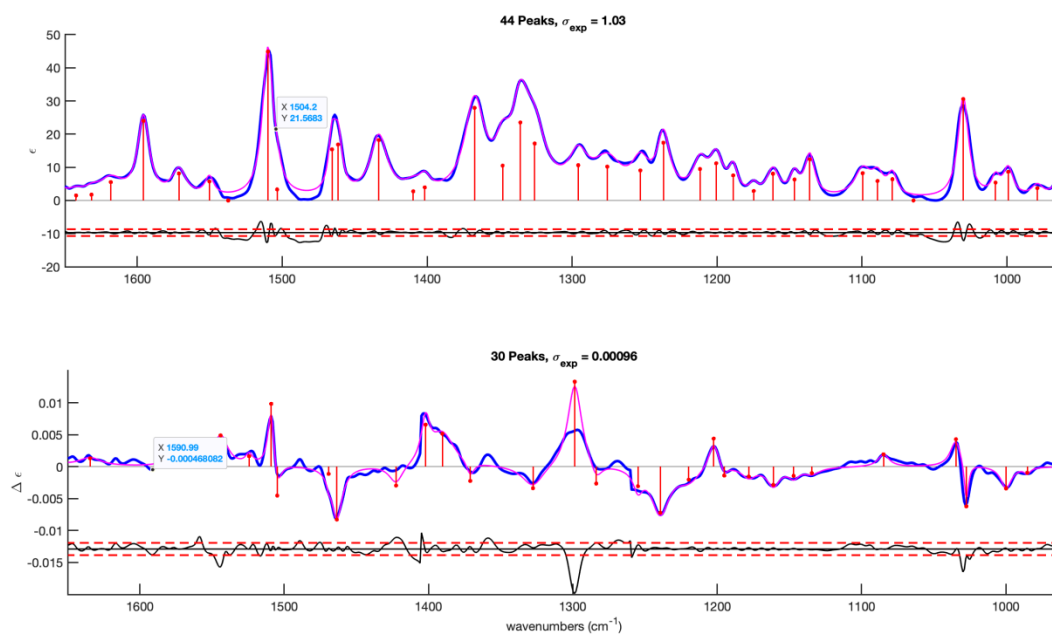

**Figure S3.** Experimental (solid blue line) absorption (top) and VCD (bottom) spectrum for (X,Sa)-8, together with a fit in terms of Lorentzian peaks. The continuous black line indicates the residuals and the dotted red line the estimated standard deviation.

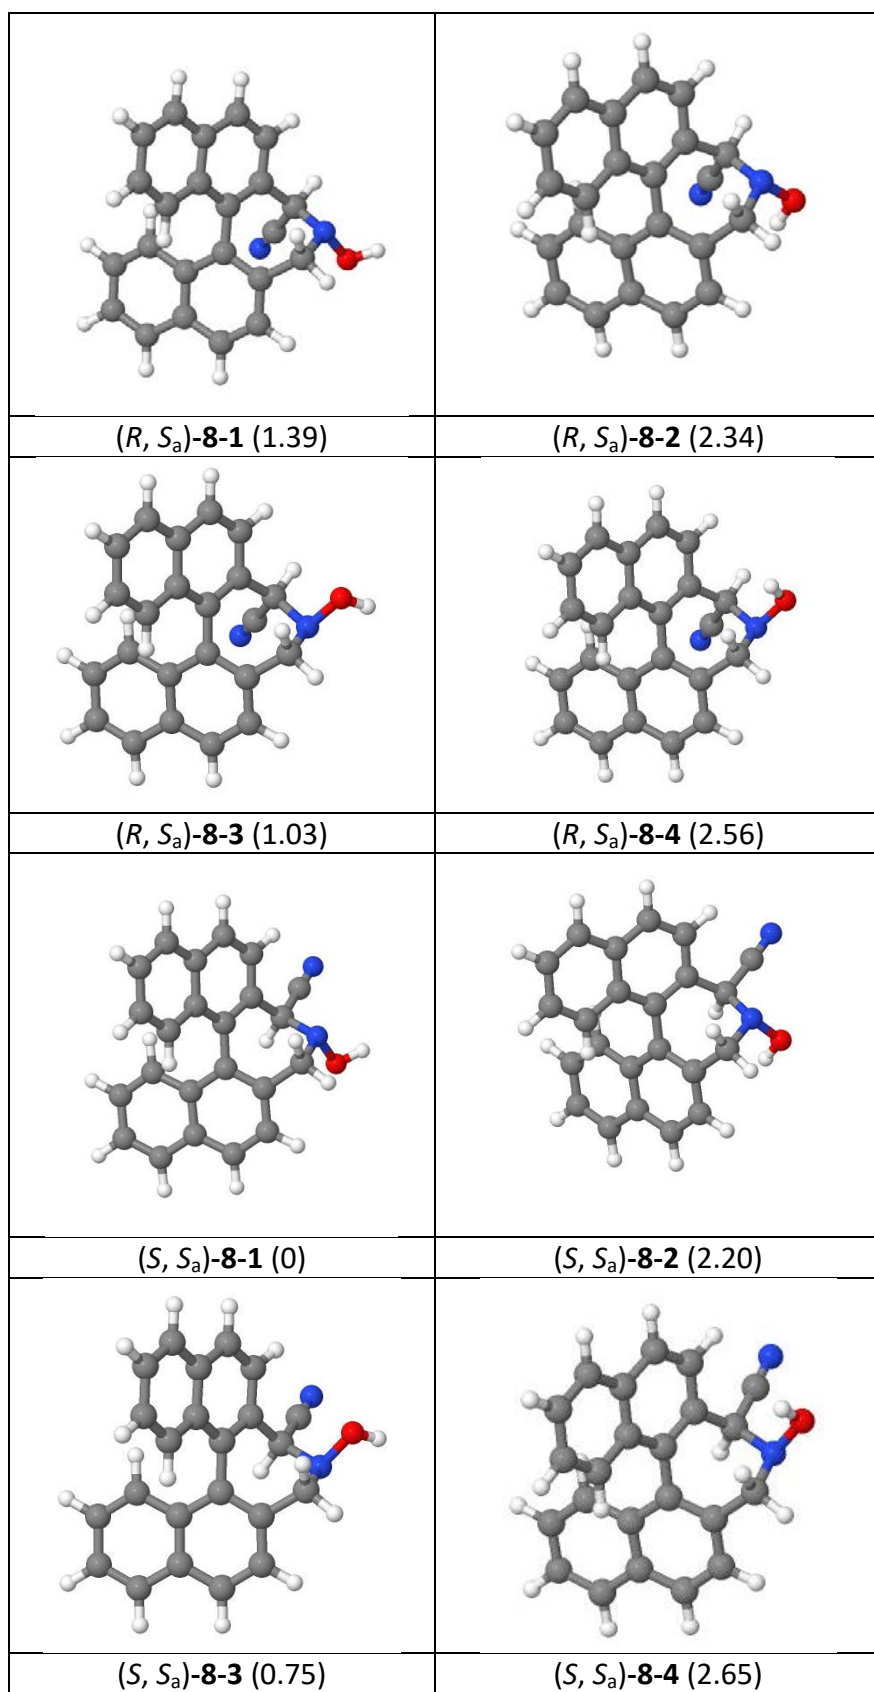

**Figure S4.** Sketches of conformers for the diastereomers of **8** optimized at the PCM- $\omega$ B97xD/6-311++G\*\* level. Relative energies in kcal mol<sup>-1</sup> are given in parentheses.

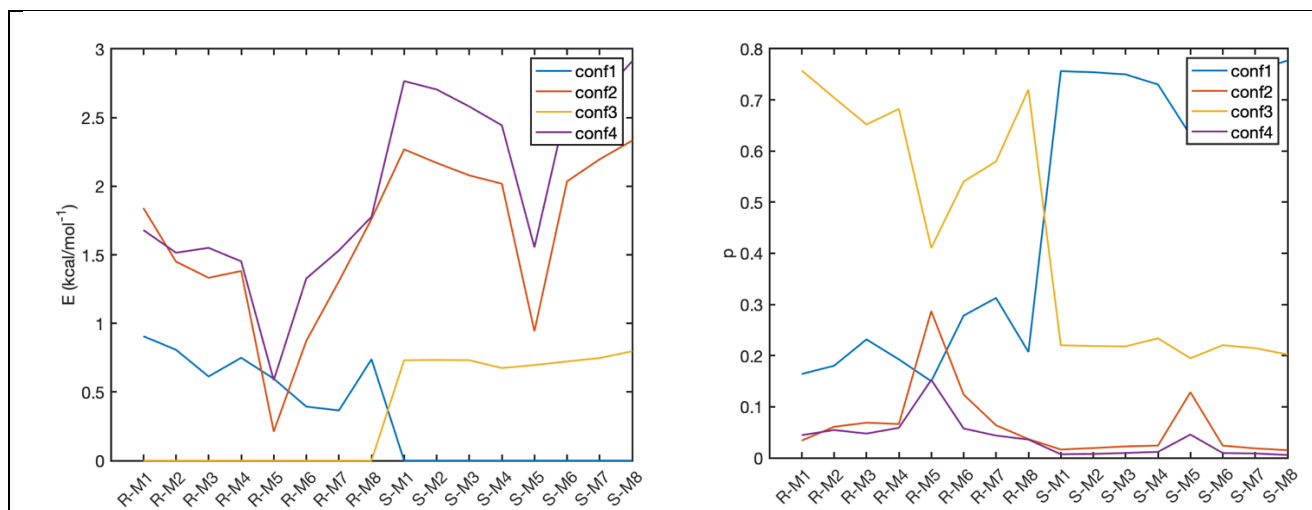

**Figure S5.** Relative energies and populations at room temperature of the four conformers of (*R*,*S*<sub>a</sub>) and (*S*,*S*<sub>a</sub>), computed by 8 different model chemistries: 1) B3LYP/cc-PVTZ, 2) B3LYP/6-31G\*, 3) B3PW91/TZ2P, 4) B3PW91/cc-PVTZ, 5) B97D/TZ2P, 6)  $\omega$ -B97XD/6-31G\*, 7)  $\omega$ -B97XD/6-311++G\*\*, 8) B3LYP/TZ2P, using in all cases the PCM method, to model the effect of the solvent.

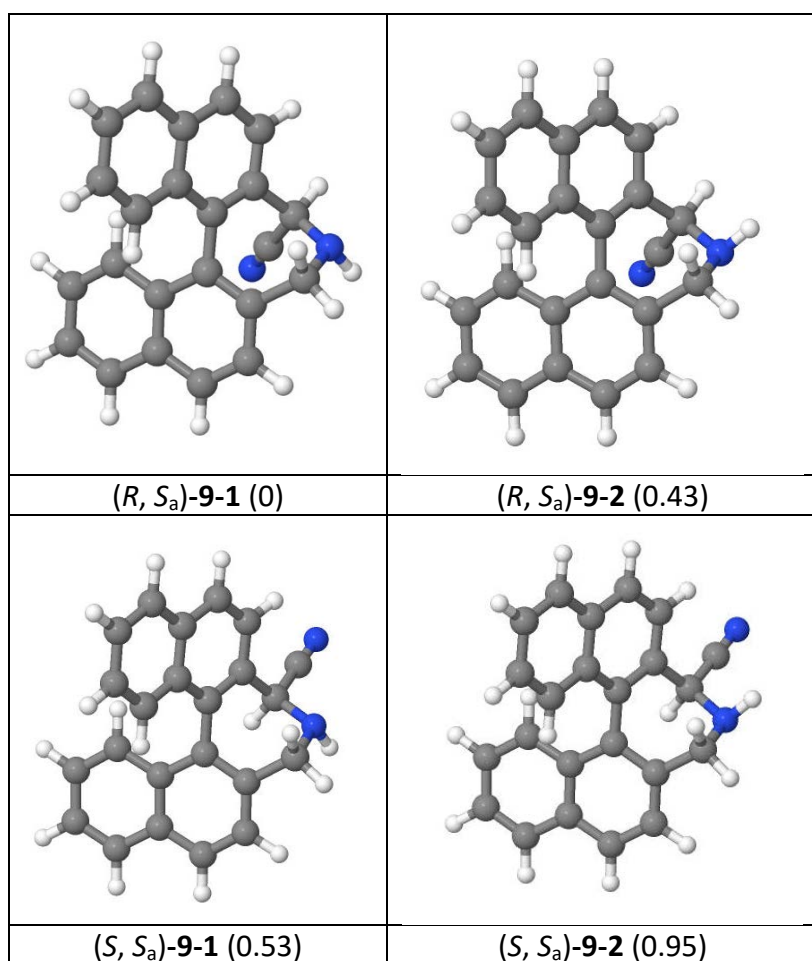

**Figure S6.** Sketches of conformers for the diastereomers of **9** optimized at the PCM- $\omega$ B97XD/6-311++G\*\* level. Relative energies in kcal mol<sup>-1</sup> are given in parentheses.

**Table S1.** Bootstrap values of means,  $\langle \cdot \rangle_b$ , and standard deviations,  $s_b(\cdot)$ , of the five GOFIs studied in ref. 46 for the two possible diastereomers of **8**, computed either by a plain PCM-B3LYP/6-31G\* calculation or by its MA version. The last two columns of the table report the differences of the GOFIs computed for the R and S configuration, and an estimate of the error on the difference computed by standard error propagation:  $s_b^2(\Delta \cdot) = s_b^2(\cdot_R) + s_b^2(\cdot_S)$ .

|      | (R,S <sub>a</sub> )       |              | (S,S <sub>a</sub> )       |              | (R,S <sub>a</sub> ) - (S,S <sub>a</sub> ) |                     |
|------|---------------------------|--------------|---------------------------|--------------|-------------------------------------------|---------------------|
|      | $\langle \cdot \rangle_b$ | $s_b(\cdot)$ | $\langle \cdot \rangle_b$ | $s_b(\cdot)$ | $\langle \Delta \cdot \rangle_b$          | $s_b(\Delta \cdot)$ |
| RMSE | 3.02                      | 0.16         | 3.40                      | 0.13         | 0.38                                      | 0.21                |
| MAE  | 1.94                      | 0.09         | 2.40                      | 0.09         | 0.46                                      | 0.13                |
| MAD  | 1.16                      | 0.08         | 1.38                      | 0.09         | 0.21                                      | 0.12                |
| MMAR | 1.07                      | 0.05         | 1.32                      | 0.05         | 0.25                                      | 0.07                |
| COSI | 0.33                      | 0.03         | 0.16                      | 0.03         | -0.17                                     | 0.04                |
| RMSE | 1.15                      | 0.04         | 1.15                      | 0.05         | 0.00                                      | 0.07                |
| MAE  | 0.85                      | 0.03         | 0.87                      | 0.03         | 0.02                                      | 0.04                |
| MAD  | 0.61                      | 0.03         | 0.61                      | 0.03         | 0.00                                      | 0.04                |
| MMAR | 0.94                      | 0.02         | 1.04                      | 0.02         | 0.10                                      | 0.03                |
| COSI | 0.41                      | 0.02         | 0.28                      | 0.03         | -0.14                                     | 0.04                |

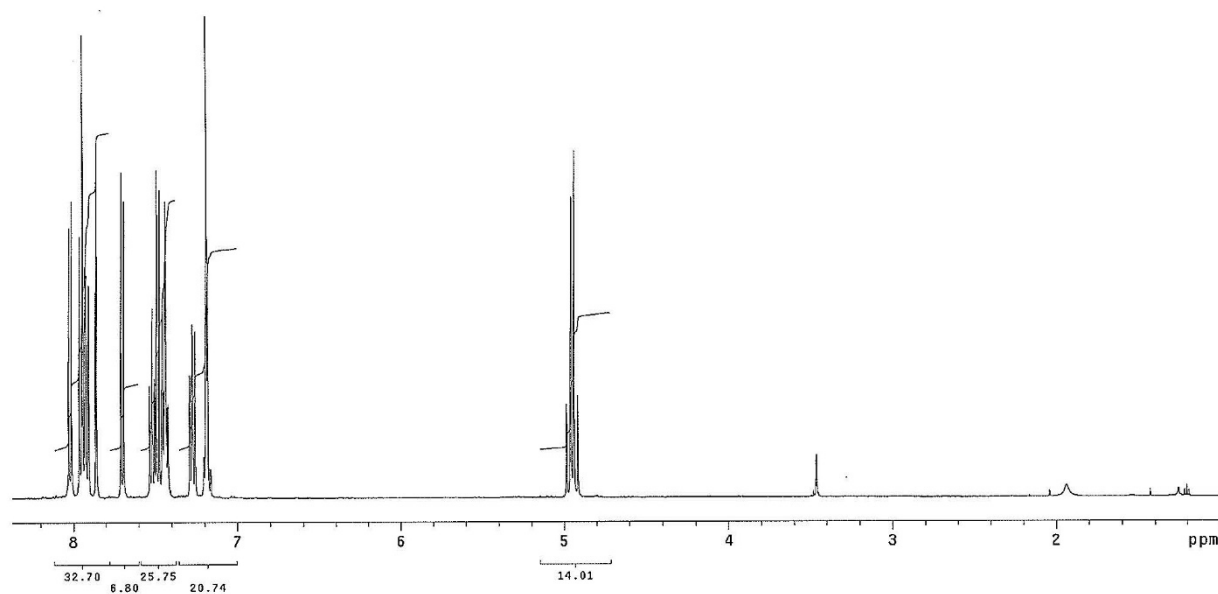

**Figure S7.** <sup>1</sup>H NMR spectrum of compound (S)-7.

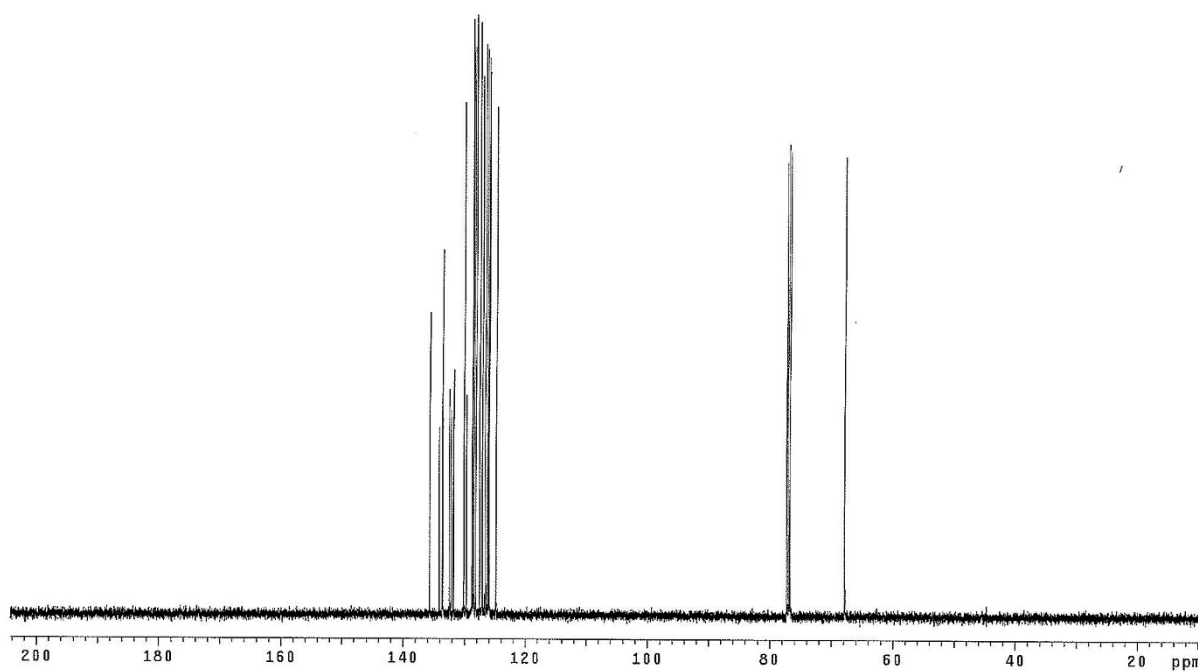

**Figure S8.** <sup>13</sup>C NMR spectrum of compound (S)-7.

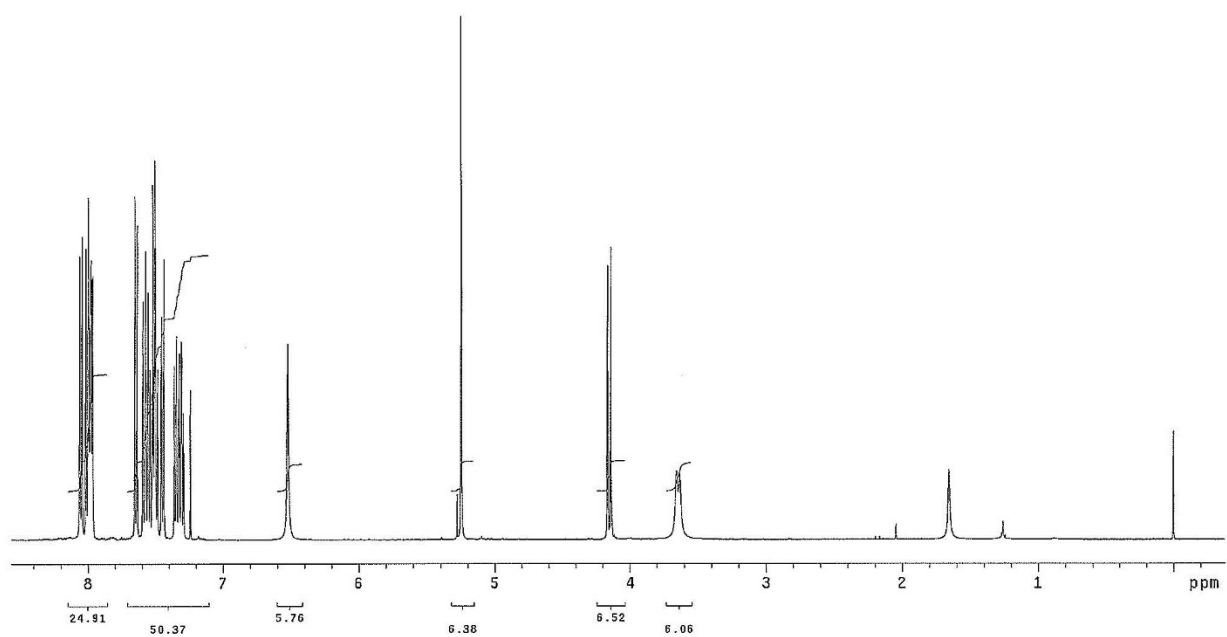

**Figure S9.**  $^1\text{H}$  NMR spectrum of compound (*R,S*)-8.

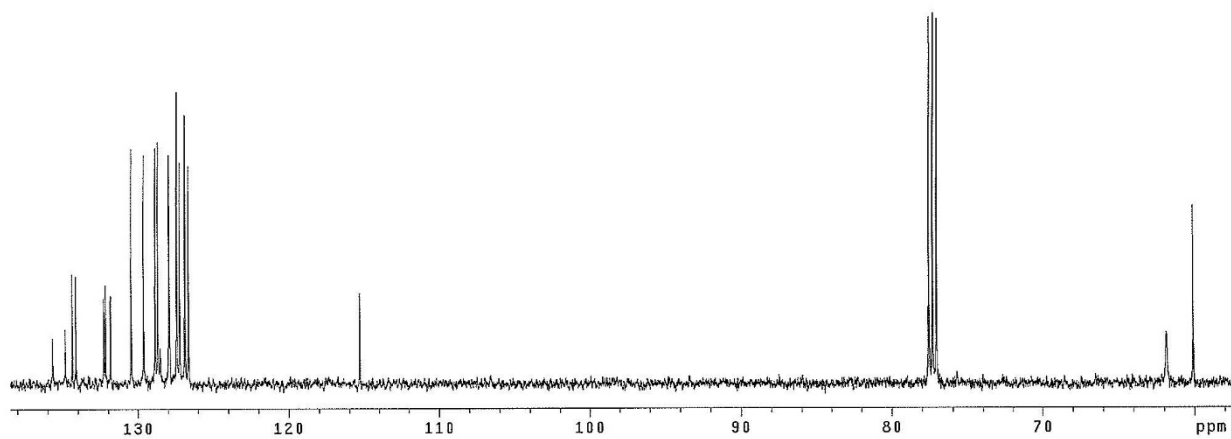

**Figure S10.**  $^{13}\text{C}$  NMR spectrum of compound (*R,S*)-8.



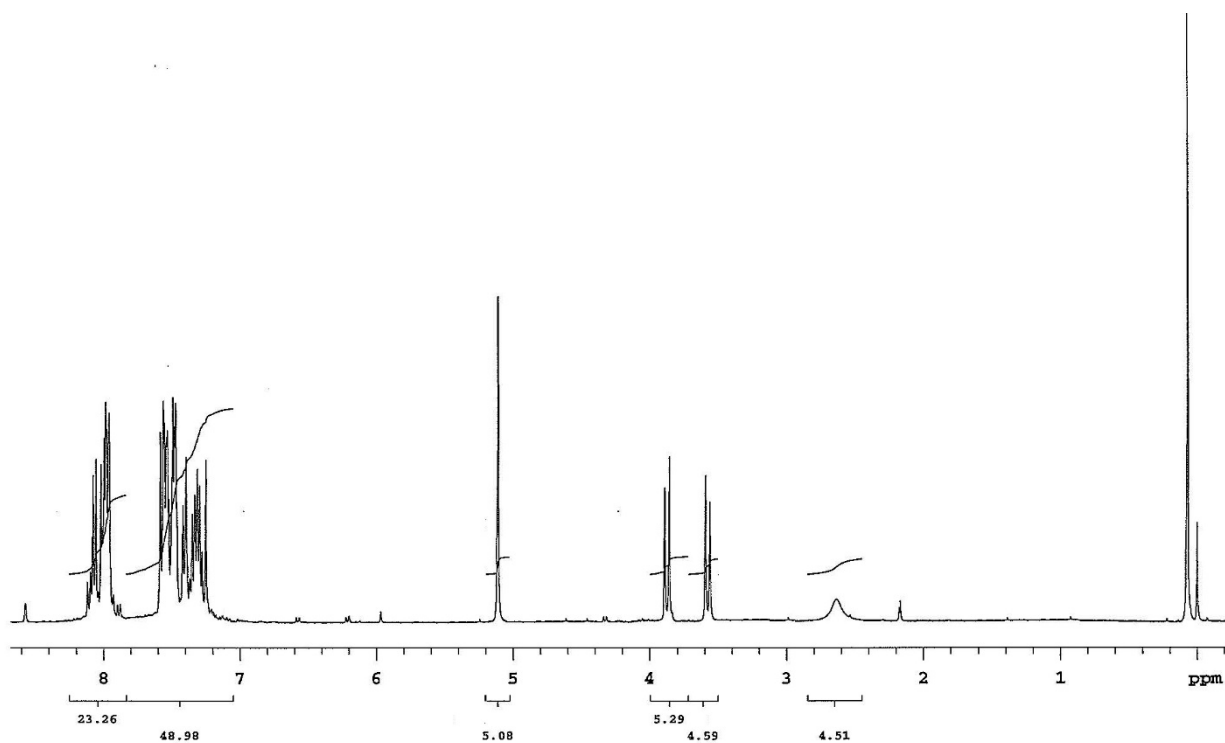

**Figure S11.** <sup>1</sup>H NMR spectrum of compound (R,S)-9.

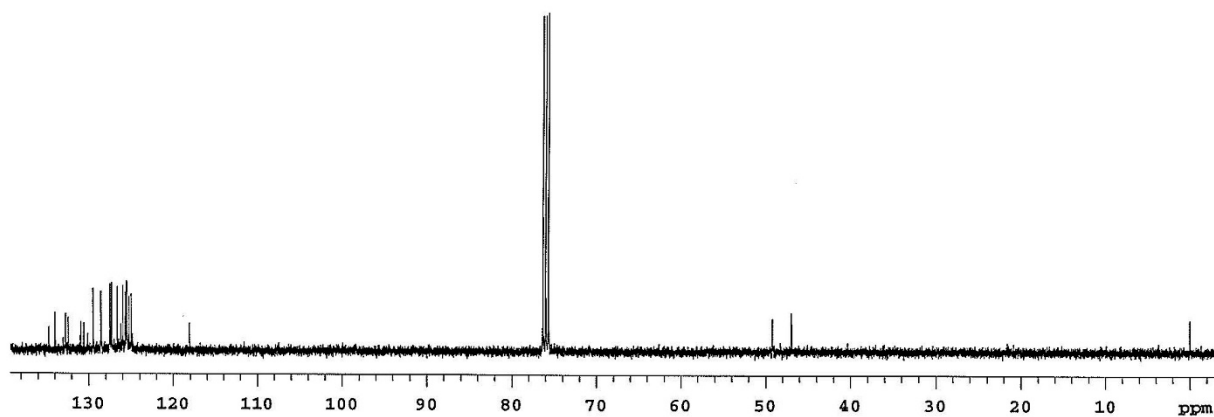

**Figure S12.** <sup>13</sup>C NMR spectrum of compound (R,S)-9.

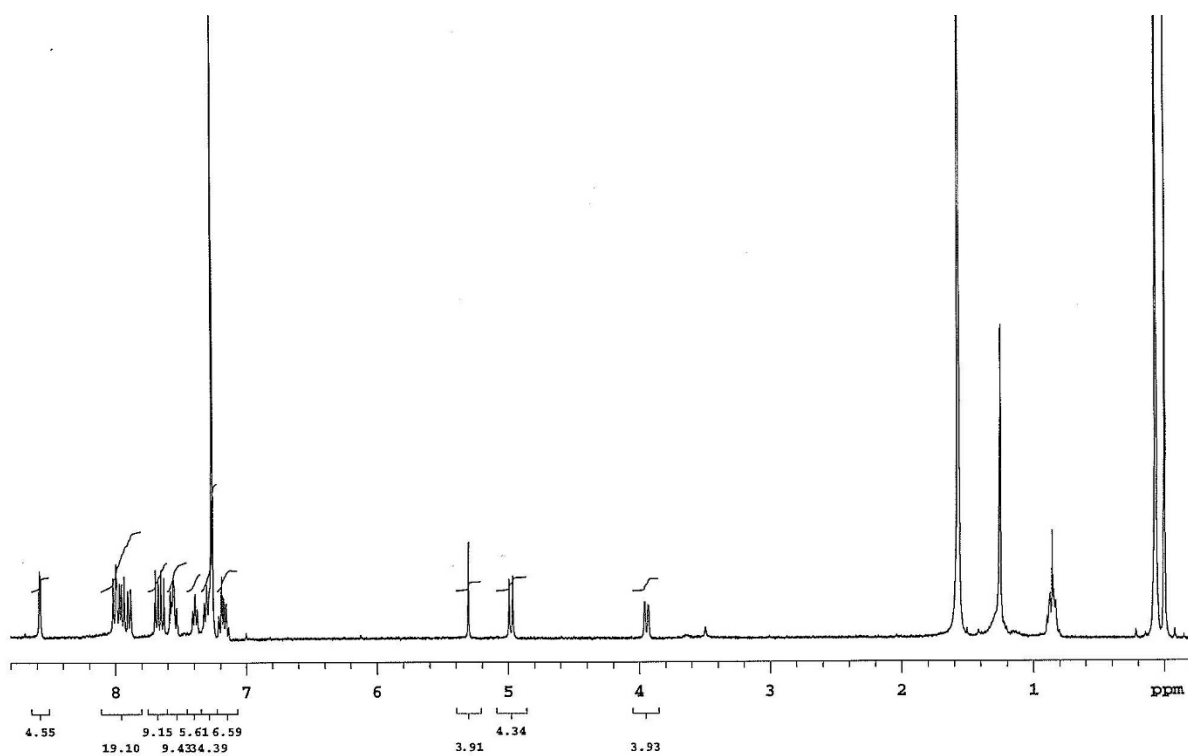

**Figure S13.**  $^1\text{H}$  NMR spectrum of compound (R,S)-3.

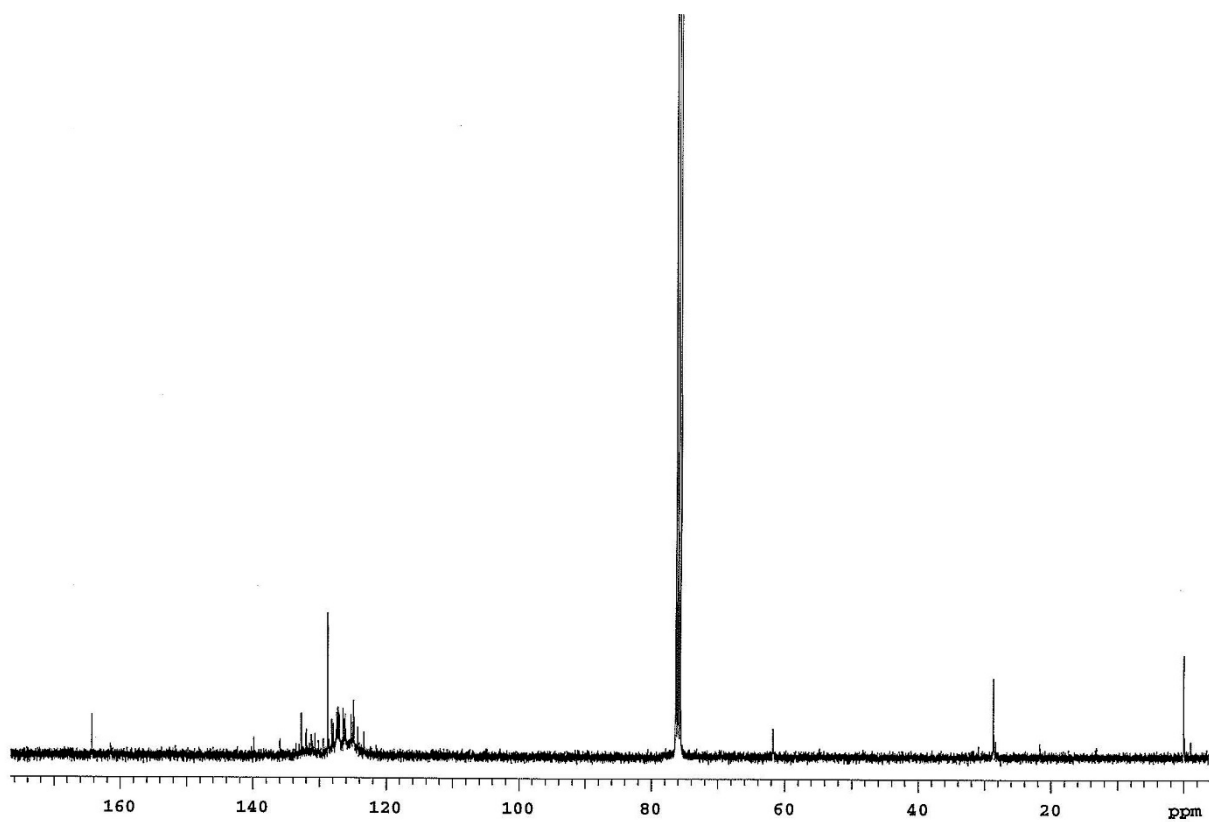

**Figure S14.**  $^{13}\text{C}$  NMR spectrum of compound (R,S)-3.

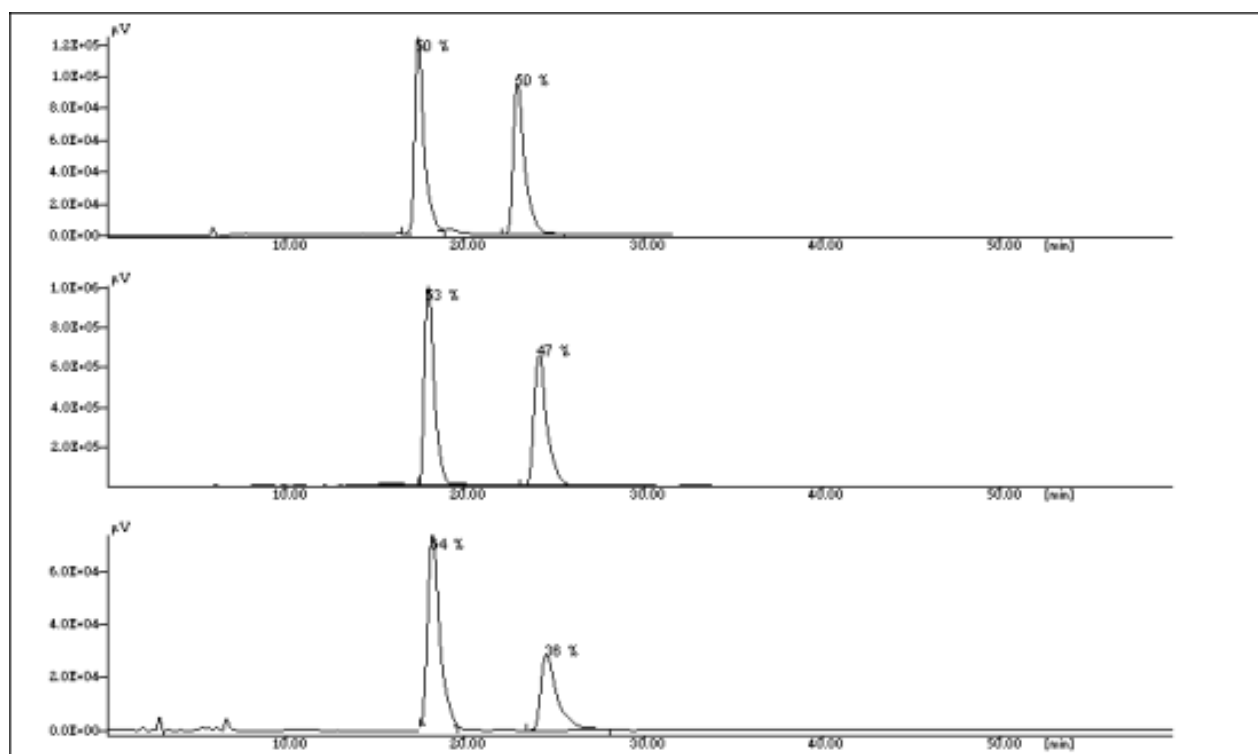

**Figure S15.** HPLC traces of compound **18** (Chiralcel OD: hexane/isopropanol 90:10 flow = 0.5 mL/min  $\lambda$  = 254 nm). Upper trace, reference of racemic compound. Middle trace, compound from catalyst **9** (entry 1 Table 1). Bottom trace, compound from catalyst **3** (entry 2 Table 1).

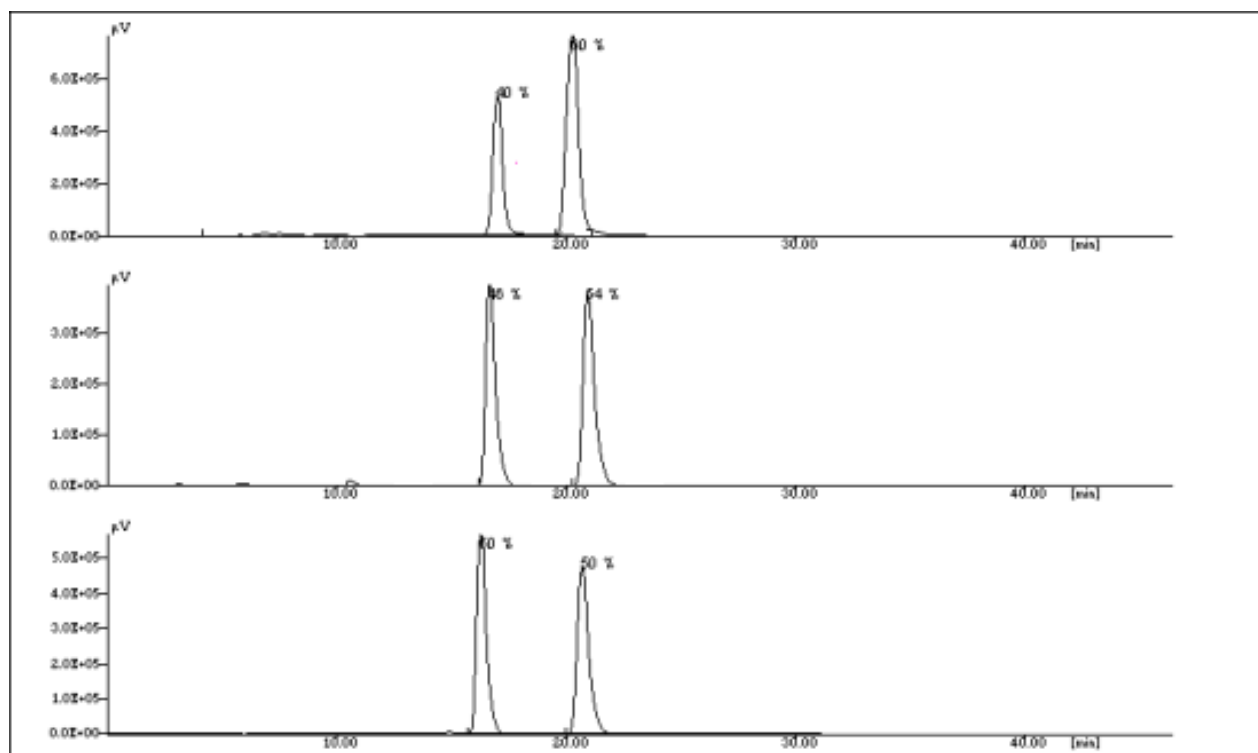

**Figure S16.** HPLC traces of compound **19** (Chiralcel OD: hexane/isopropanol 90:10 flow = 0.5 mL/min  $\lambda$  = 254 nm). Upper trace, compound from catalyst **3** (entry 4 Table 1). Middle trace, compound from catalyst **9** (entry 3 Table 1). Bottom trace, reference of racemic compound.
